# Supplementary material
Source: MDPI journal article supplement (https://www.mdpi.com/2813-0618/1/2/7)
Supplement: s1 [file s1 › pharmacoepidemiology-1727399-supplementary.pdf]

## Supplemental material

| <b>Table S1. Non-cardiac DB-drugs included in this study were defined as drugs listed on the <a href="http://www.brugadadrugs.org">www.brugadadrugs.org</a> website</b>                                                                                                                                                                                                                                                                                                                       |
|-----------------------------------------------------------------------------------------------------------------------------------------------------------------------------------------------------------------------------------------------------------------------------------------------------------------------------------------------------------------------------------------------------------------------------------------------------------------------------------------------|
| amitriptyline (N06AA09), clomipramine (N06AA04), lithium (N05AN01), nortryptiline (N06AA10), oxcarbazepine (N03AF02), carbamazepine (N03AF01), dosulepin (N06AA16), doxepin (N06AA12), fluoxetine (N06AB03), fluvoxamine (N06AB08), imipramine (N06AA02), lamotrigine (N03AX09), maprotiline (N06AA21), paroxetine (N06AB05), phenytoin (N03AB02), tramadol (N02AJ13, N02AX52, N02AX02), indapamide (C03BA11), metoclopramide (A03FA01), fexofenadine (R06AX26), bupropion (N06AX12, N07BA02) |
| Not included in this study since these drugs were not registered in The Netherlands or there were no users in our dataset: desipramine, trifluorperazine, bupivacaine, procaine, propofol, thioridazine, ketamine, diphenhydramine                                                                                                                                                                                                                                                            |

| <b>Table S2. Risk for out-of-hospital cardiac arrest upon use of non-cardiac depolarization blocking drugs: stratification according to cardiovascular drugs use</b>                                                      |             |                   |                 |                 |
|---------------------------------------------------------------------------------------------------------------------------------------------------------------------------------------------------------------------------|-------------|-------------------|-----------------|-----------------|
|                                                                                                                                                                                                                           | OHCA-cases  | Non-OHCA controls | Crude OR*       | Adjusted OR†    |
| Cardiovascular drugs use                                                                                                                                                                                                  | 3516        | 8551              |                 |                 |
| No use of any non-cardiac DB-drugs                                                                                                                                                                                        | 3193 (90.8) | 7961 (93.1)       | 1.0 (reference) | 1.0 (reference) |
| Use of non-cardiac DB-drugs                                                                                                                                                                                               | 323 (9.2)   | 590 (6.9)         | 1.3 (1.2-1.6)   | 1.3 (1.2-1.5)   |
|                                                                                                                                                                                                                           |             |                   |                 |                 |
| No cardiovascular drugs use                                                                                                                                                                                               | 1957        | 13315             |                 |                 |
| No use of any non-cardiac DB-drugs                                                                                                                                                                                        | 1853 (94.7) | 13070 (98.2)      | 1.0 (reference) | 1.0 (reference) |
| Use of non-cardiac DB-drugs                                                                                                                                                                                               | 104 (5.3)   | 245 (1.8)         | 2.9 (2.3-3.7)   | 2.8 (2.2-3.6)   |
| OR, odds ratio. Numbers are number (%) unless indicated otherwise. P-value interaction stratification according cardiovascular disease <0.001. *Adjusted for age and sex. †Adjusted for age, sex and use of antidiabetics |             |                   |                 |                 |

| <b>Table S3. Risk for out-of-hospital cardiac arrest upon use of non-cardiac depolarization blocking drugs with or without QT-prolonging potential</b>                                                                                                                                                                                                                                 |             |                   |                 |                 |
|----------------------------------------------------------------------------------------------------------------------------------------------------------------------------------------------------------------------------------------------------------------------------------------------------------------------------------------------------------------------------------------|-------------|-------------------|-----------------|-----------------|
|                                                                                                                                                                                                                                                                                                                                                                                        | OHCA-cases  | Non-OHCA controls | Crude OR        | Adjusted OR     |
|                                                                                                                                                                                                                                                                                                                                                                                        | 5473        | 21866             |                 |                 |
| No use of any non-cardiac DB-drugs                                                                                                                                                                                                                                                                                                                                                     | 5046 (92.2) | 21031 (96.2)      | 1.0 (reference) | 1.0 (reference) |
| Use of non-cardiac DB-drugs with QT-prolonging potential                                                                                                                                                                                                                                                                                                                               | 362 (6.6)   | 723 (3.3)         | 2.1 (1.8-2.4)   | 1.6 (1.4-1.8)   |
| Use of non-cardiac DB-drugs without QT-prolonging potential                                                                                                                                                                                                                                                                                                                            | 58 (1.1)    | 96 (0.4)          | 2.5 (1.8-3.5)   | 2.1 (1.5-2.9)   |
| OR, odds ratio. Numbers are number (%) unless indicated otherwise. Odds ratio adjusted for use of cardiovascular drugs, antidiabetics and Vaughan-Williams class I or III antiarrhythmic drugs.<br>Combined use of non-cardiac DB-drugs included and not included in <a href="http://www.CredibleMeds.org">www.CredibleMeds.org</a> :<br>cases (%) / controls (%) = 7 (0.1) / 16 (0.1) |             |                   |                 |                 |
| Use of non-cardiac DB-drugs listed in <a href="http://www.CredibleMeds.org">www.CredibleMeds.org</a> : amitriptyline, clomipramine, desipramine, lithium, nortryptiline, bupivacaine, procaine, propofol, doxepin, fluoxetine, fluvoxamine, imipramine, maprotiline, paroxetine, thioridazine, tramadol, diphenhydramine, indapamide, metoclopramide                                   |             |                   |                 |                 |
| Use of non-cardiac DB-drugs not listed in <a href="http://www.CredibleMeds.org">www.CredibleMeds.org</a> : oxcarbazepine, trifluorperazine, bupropion, carbamazepine, dosulepine, lamotrigine, phenytoin, ketamine, fexofenadine                                                                                                                                                       |             |                   |                 |                 |

| Table S4. Number of drugs being simultaneously dispensed |                 |                     |
|----------------------------------------------------------|-----------------|---------------------|
|                                                          | Cases<br>(5473) | Controls<br>(21866) |
| Number of drugs                                          |                 |                     |
| 0                                                        | 1902 (34.8)     | 13154 (60.2)        |
| 1                                                        | 615 (11.2)      | 1931 (8.8)          |
| 2                                                        | 609 (11.1)      | 1902 (8.7)          |
| 3                                                        | 631 (11.5)      | 1790 (8.2)          |
| ≥4                                                       | 1716 (31.4)     | 3089 (14.1)         |
